# Supplementary material for: Homeostasis and transitional activation of regulatory T cells require c-Myc
Source: PubMed Central journal article supplement — Sci Adv. 2020 Jan 1;6(1):eaaw6443. doi: 10.1126/sciadv.aaw6443 (PMC6938709; doi:10.1126/sciadv.aaw6443), 2020-01-01
Supplement: aaw6443_SM.pdf [file aaw6443_SM.pdf]

## Supplementary Materials for

### Homeostasis and transitional activation of regulatory T cells require c-Myc

Jordy Saravia, Hu Zeng, Yogesh Dhungana, Daniel Bastardo Blanco, Thanh-Long M. Nguyen, Nicole M. Chapman, Yanyan Wang, Apurva Kanneganti, Shaofeng Liu, Jana L. Raynor, Peter Vogel, Geoffrey Neale, Peter Carmeliet, Hongbo Chi\*

\*Corresponding author. Email: hongbo.chi@stjude.org

Published 1 January 2020, *Sci. Adv.* **6**, eaaw6443 (2020)

DOI: 10.1126/sciadv.aaw6443

#### This PDF file includes:

Fig. S1. Myc function is important for neonatal T<sub>reg</sub> function and accumulation.

Fig. S2. Impaired in vitro T<sub>reg</sub> suppression with Myc deficiency and rescue of immune homeostasis in mixed BM chimeric mice.

Fig. S3. Constitutive Myc expression in T<sub>regs</sub> does not affect immune homeostasis.

Fig. S4. CD4<sup>+</sup> and CD8<sup>+</sup> T cell responses in *Foxp3*<sup>Cre/DTR</sup> mosaic mice and mice with tamoxifen-induced Myc deletion.

Fig. S5. Immune homeostasis in mice with Cox10- or Cpt1a-deficient T<sub>regs</sub>.

**Figure S1**

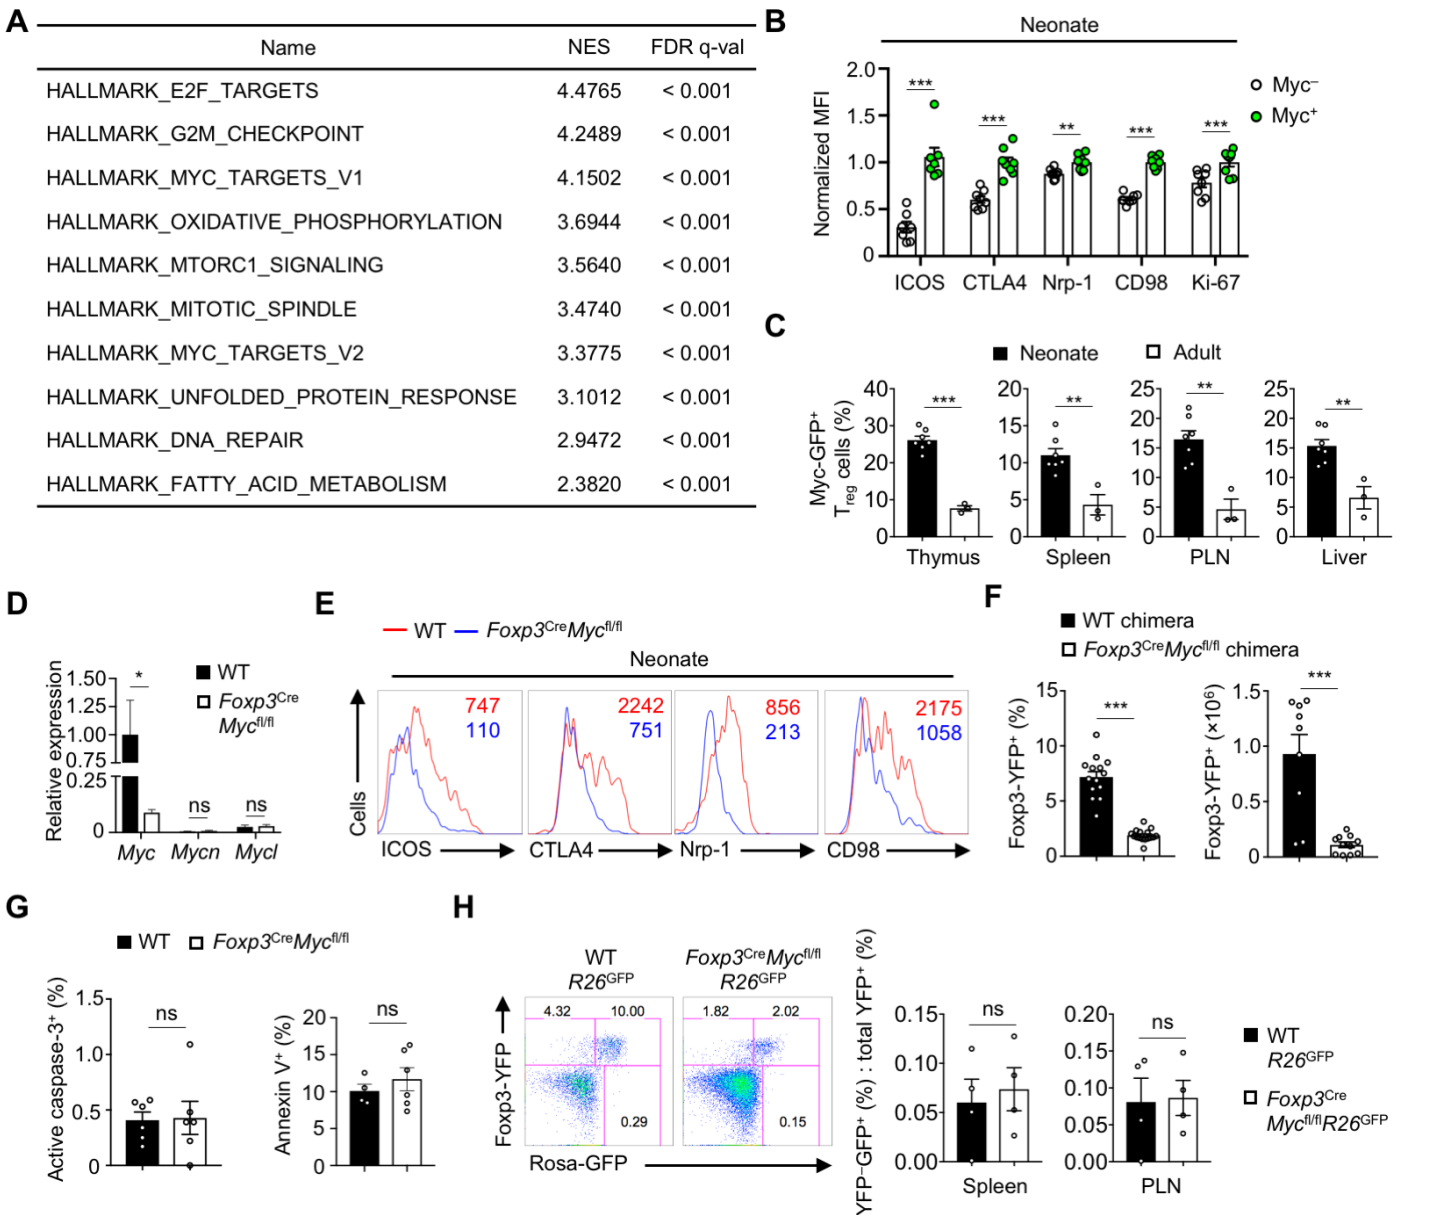

**Fig. S1. Myc function is important for neonatal T<sub>reg</sub> function and accumulation.** (A) Enrichment of Hallmark gene sets in neonatal vs. adult T<sub>reg</sub> cells (22). NES, normalized enrichment scores; FDR, false discovery rate. (B) Flow cytometry analysis of the indicated effector molecule expression by Myc<sup>+</sup> vs. Myc<sup>-</sup> T<sub>reg</sub> cells from neonatal mice. (C) Quantification of Myc-GFP expression in CD4<sup>+</sup>Foxp3-RFP<sup>+</sup> T<sub>reg</sub> cells from indicated tissues in neonatal (5–10 days) and adult (6–8 weeks) *Foxp3<sup>RFP</sup>Myc-GFP* mice. (D) Deletion efficiency of *Myc* and expression of *Myc* family genes in T<sub>reg</sub> cells from WT and *Foxp3<sup>Cre</sup>Myc<sup>fl/fl</sup>* mice. (E) Flow cytometry analysis of indicated effector molecule expression on/in splenic T<sub>reg</sub> cells from neonatal WT and *Foxp3<sup>Cre</sup>Myc<sup>fl/fl</sup>* mice. (F) Flow cytometry analysis of *Myc*-deficient/WT (CD45.2<sup>+</sup>) and congenic (CD45.1<sup>+</sup>) *Foxp3<sup>+</sup>* T<sub>reg</sub> cells in mixed bone marrow (BM) chimeric mice. (G) Flow cytometry analysis of active caspase-3 and Annexin V in/on splenic T<sub>reg</sub> cells from WT and *Foxp3<sup>Cre</sup>Myc<sup>fl/fl</sup>* mice. (H) Analysis for “ex-T<sub>reg</sub>” cells using control or *Foxp3<sup>Cre</sup>Myc<sup>fl/fl</sup>R26<sup>GFP</sup>* lineage tracing system. T<sub>reg</sub> cells include YFP<sup>+</sup>GFP<sup>+</sup> and YFP<sup>+</sup>GFP<sup>-</sup> populations, and ex-T<sub>reg</sub> cells are YFP<sup>+</sup>GFP<sup>-</sup>. \**P* ≤ 0.05; \*\**P* ≤ 0.01; \*\*\**P* ≤ 0.001; ns, not significant; unpaired Student’s *t*-test. Data are representative of or pooled from 1 (A, C, and D), 4 (B), 9 (E and F), or 2 (G and H) independent experiments with 1–3 mice per group per experiment. Graphs show means ± SEM.

**Figure S2**

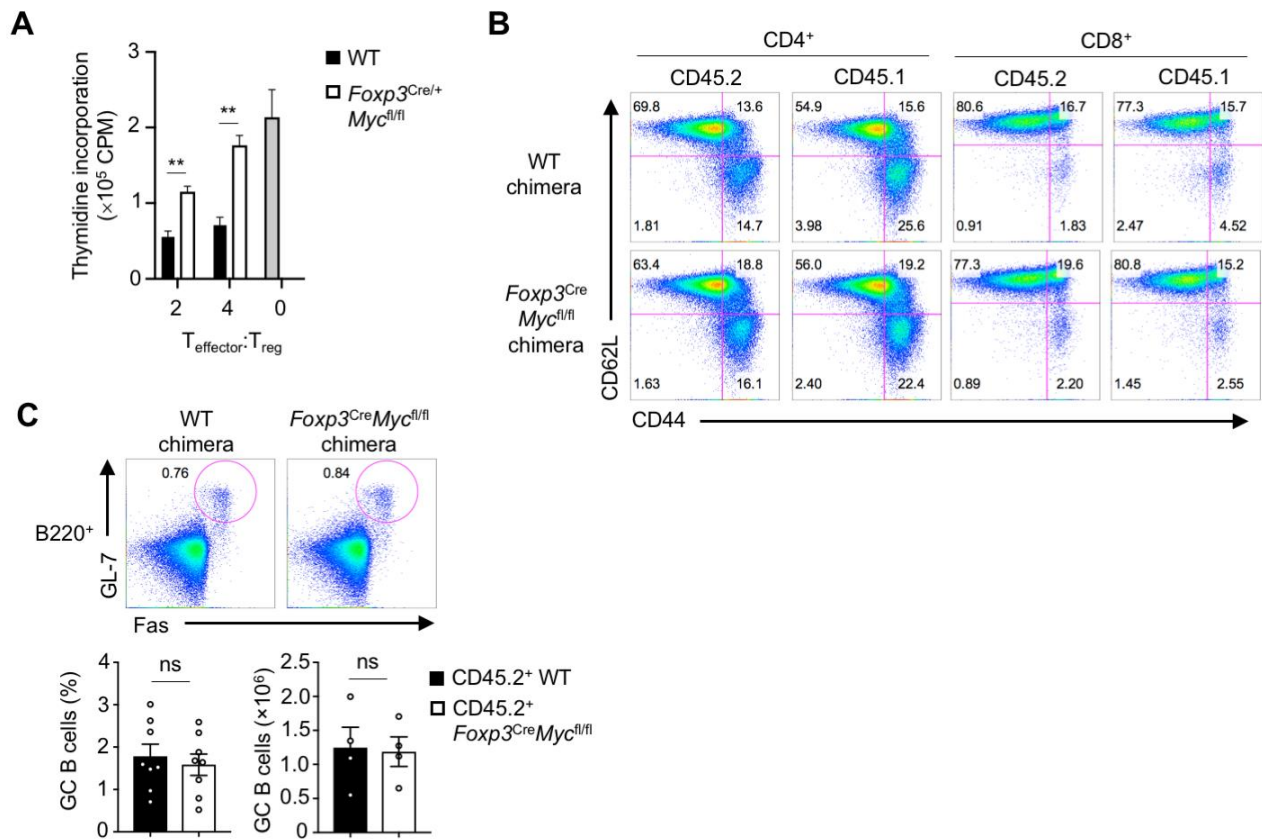

**Fig. S2. Impaired in vitro T<sub>reg</sub> suppression with Myc deficiency and rescue of immune homeostasis in mixed BM chimeric mice.** (A) T<sub>reg</sub> cell suppression assay comparing WT and Myc-deficient T<sub>reg</sub> cells. (B) Flow cytometry analysis of naïve and effector CD4<sup>+</sup> and CD8<sup>+</sup> T cell populations in mixed BM chimeric mice. (C) Flow cytometry analysis and quantification of frequency and number of GC B cells in mixed BM chimeric mice. \*\* $P \leq 0.01$ ; ns, not significant; unpaired Student's *t*-test. Data are representative of or pooled from 4 (A) or 9 (B and C) independent experiments with 1-3 mice per group per experiment. Graphs show means  $\pm$  SEM.

**Figure S3**

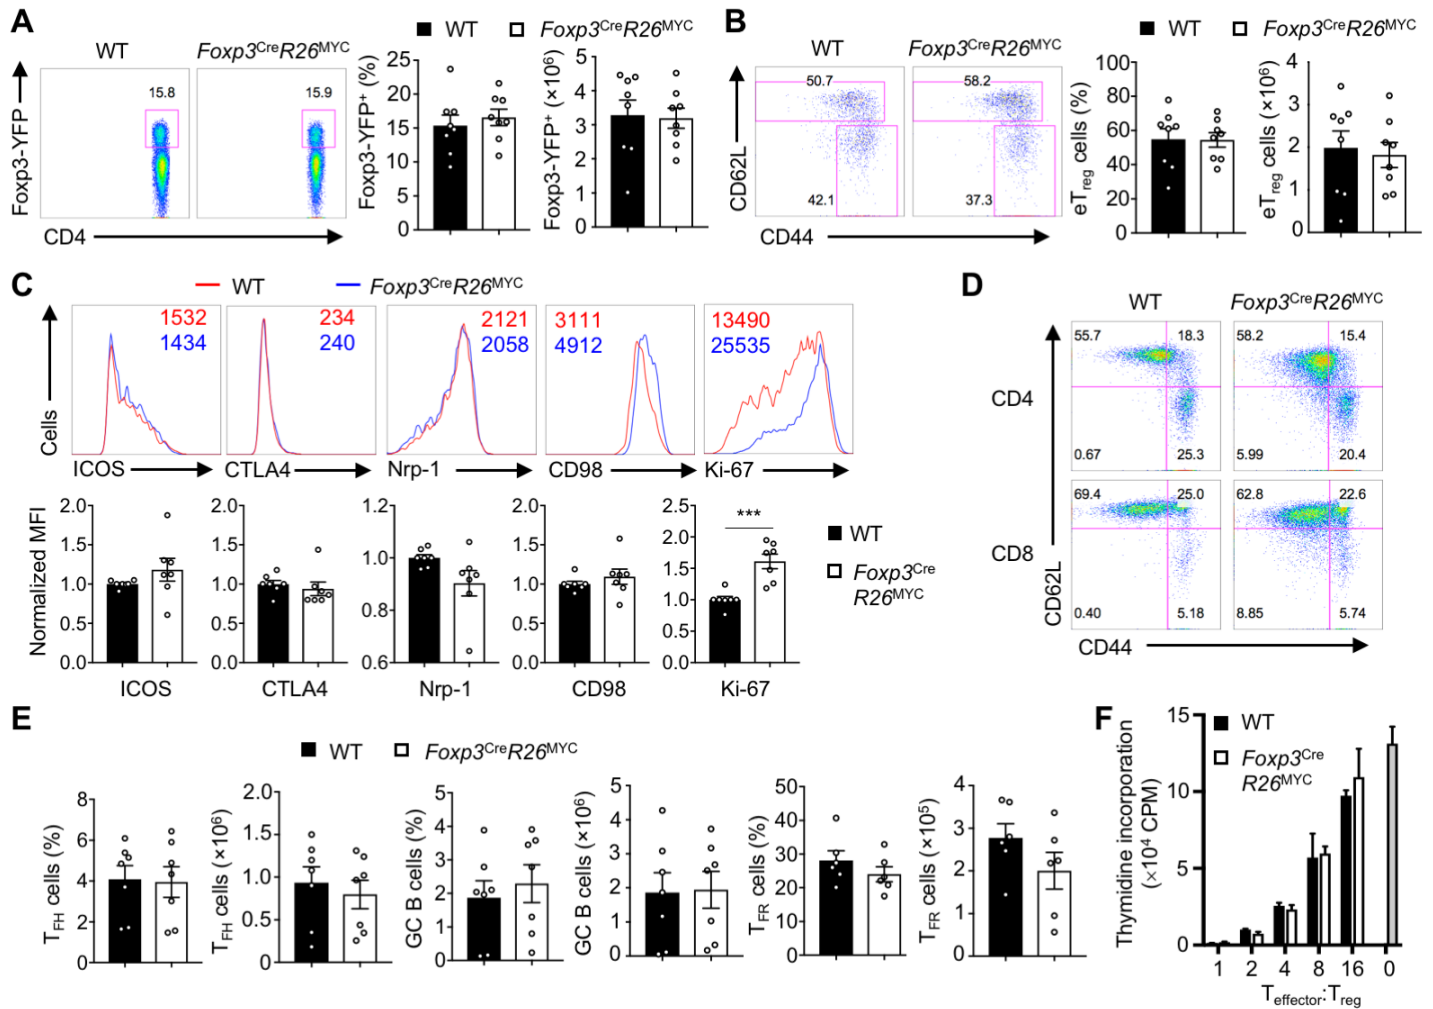

**Fig. S3. Constitutive Myc expression in  $T_{reg}$ s does not affect immune homeostasis.** (A to C) Flow cytometry analysis and quantification of total  $T_{reg}$  cells (A), e $T_{reg}$  cells (B), and indicated marker expression on/in  $T_{reg}$  cells (C) in WT and  $Foxp3^{Cre}R26^{MYC}$  mice. (D) Flow cytometry analysis of splenic naive and effector  $CD4^+$  and  $CD8^+$  T cell populations in WT and  $Foxp3^{Cre}R26^{MYC}$  mice. (E) Quantification of splenic  $T_{FH}$ , GC B, and  $T_{FR}$  cells in WT and  $Foxp3^{Cre}R26^{MYC}$  mice. (F)  $T_{reg}$  cell suppression assay comparing purified WT and Myc-overexpressing  $T_{reg}$  cells. \*\*\* $P \leq 0.001$ ; unpaired Student's  $t$ -test. Data are representative of or pooled from 4 independent experiments with 1-5 mice per group per experiment. Graphs show means  $\pm$  SEM.

**Figure S4**

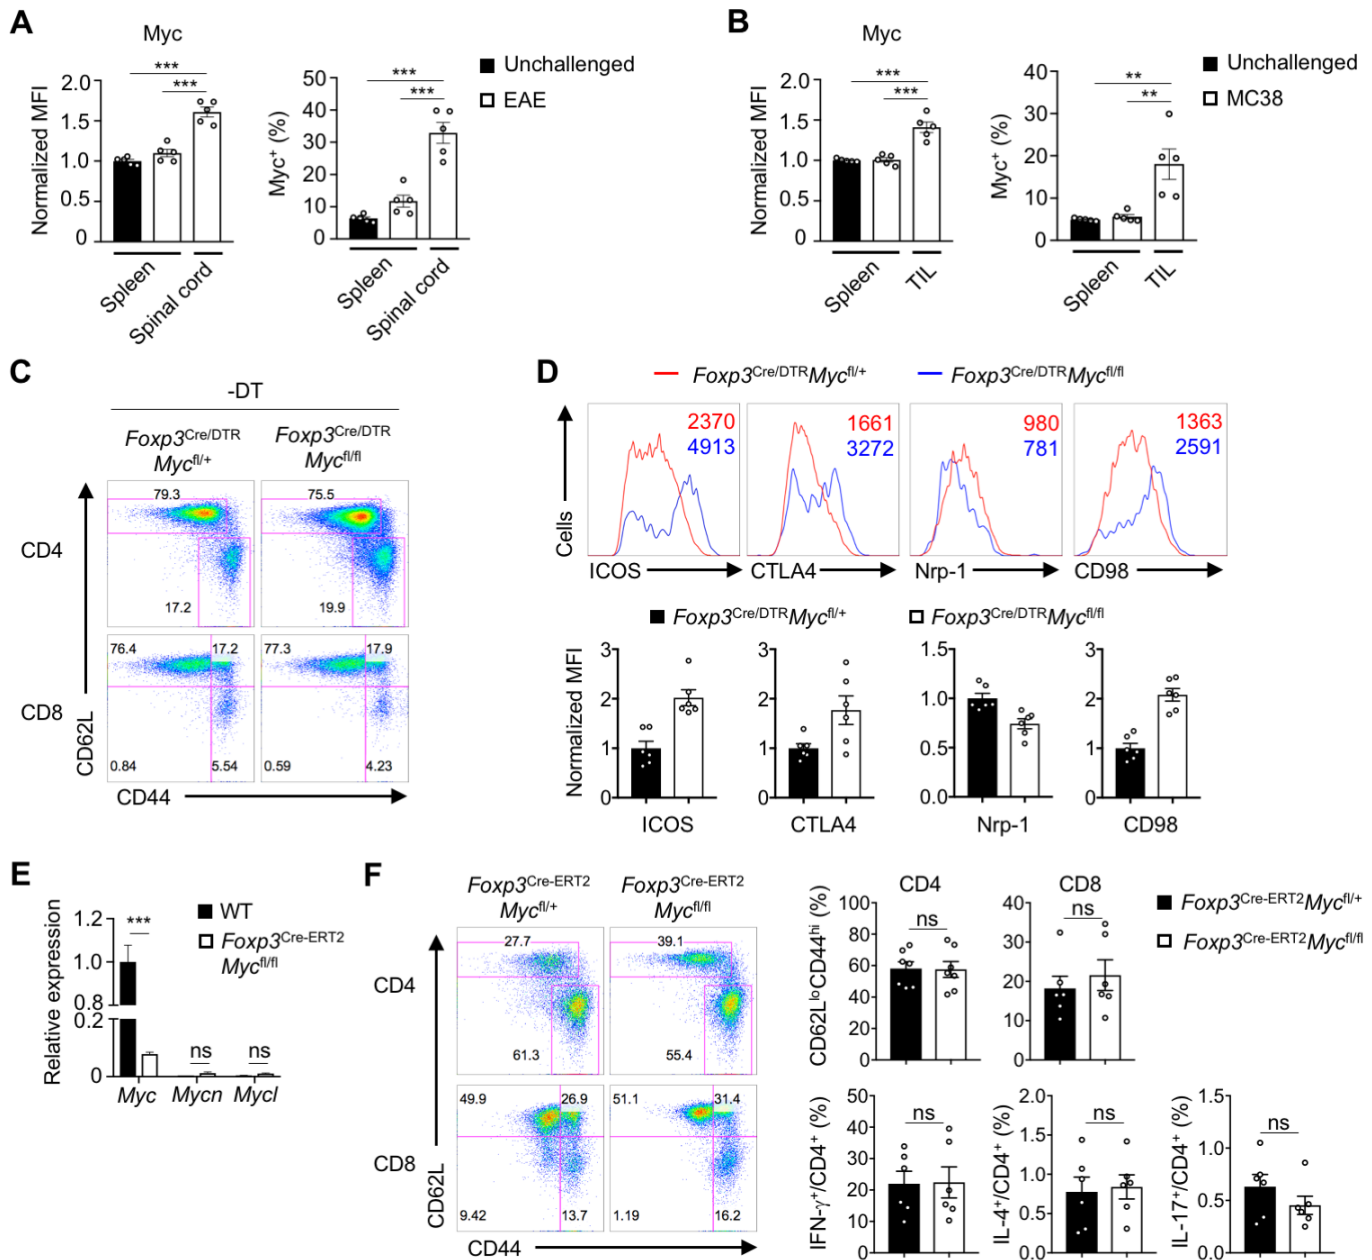

**Fig. S4. CD4<sup>+</sup> and CD8<sup>+</sup> T cell responses in *Foxp3<sup>Cre/DTR</sup>* mosaic mice and mice with tamoxifen-induced *Myc* deletion.** (A) Flow cytometry analysis of *Myc* expression (left graph) in T<sub>reg</sub> cells or the frequency of *Myc*<sup>+</sup> T<sub>reg</sub> cells in the spleen of unchallenged mice (black bars) or the spleen (middle white bars) or spinal cords (right white bars) of mice with EAE. (B) Flow cytometry analysis of *Myc* expression in T<sub>reg</sub> cells or frequency of *Myc*<sup>+</sup> T<sub>reg</sub> cells from the spleen of unchallenged mice (black bar), MC38-inoculated mice (middle white bars), or TIL of MC38-challenged mice (right white bars). Data are from five mice per group. (C) Flow cytometry analysis of naïve and effector non-T<sub>reg</sub> CD4<sup>+</sup> and CD8<sup>+</sup> T cells in *Foxp3*-DTR mosaic mice at steady state. (D) Flow cytometry analysis and quantification of indicated marker expression on/in splenic CD4<sup>+</sup>*Foxp3*-YFP<sup>+</sup> T<sub>reg</sub> cells in DT-treated mosaic mice. (E) Deletion efficiency of *Myc* and expression of *Myc* family genes in CD4<sup>+</sup>GFP<sup>+</sup>YFP<sup>+</sup> T<sub>reg</sub> cells sorted from tamoxifen-treated WT and *Foxp3<sup>Cre-ERT2</sup>Myc<sup>fl/fl</sup>* mice. (F) Flow cytometry analysis and quantification of naïve and effector CD4<sup>+</sup> and CD8<sup>+</sup> T cells, and quantification of cytokine production in T helper cell subsets in tamoxifen-treated *Foxp3<sup>Cre-ERT2</sup>Myc<sup>fl/+</sup>* and *Foxp3<sup>Cre-ERT2</sup>Myc<sup>fl/fl</sup>* mice. Data are representative of or pooled from 1 (A, B, and E), 4 (C and D) or 5 (F) independent experiments with 1-5 mice per group per experiment. \*\**P* ≤ 0.01; \*\*\**P* ≤ 0.001; ns, not significant; unpaired Student's *t*-test. Graphs show means ± SEM.



**Figure S5**

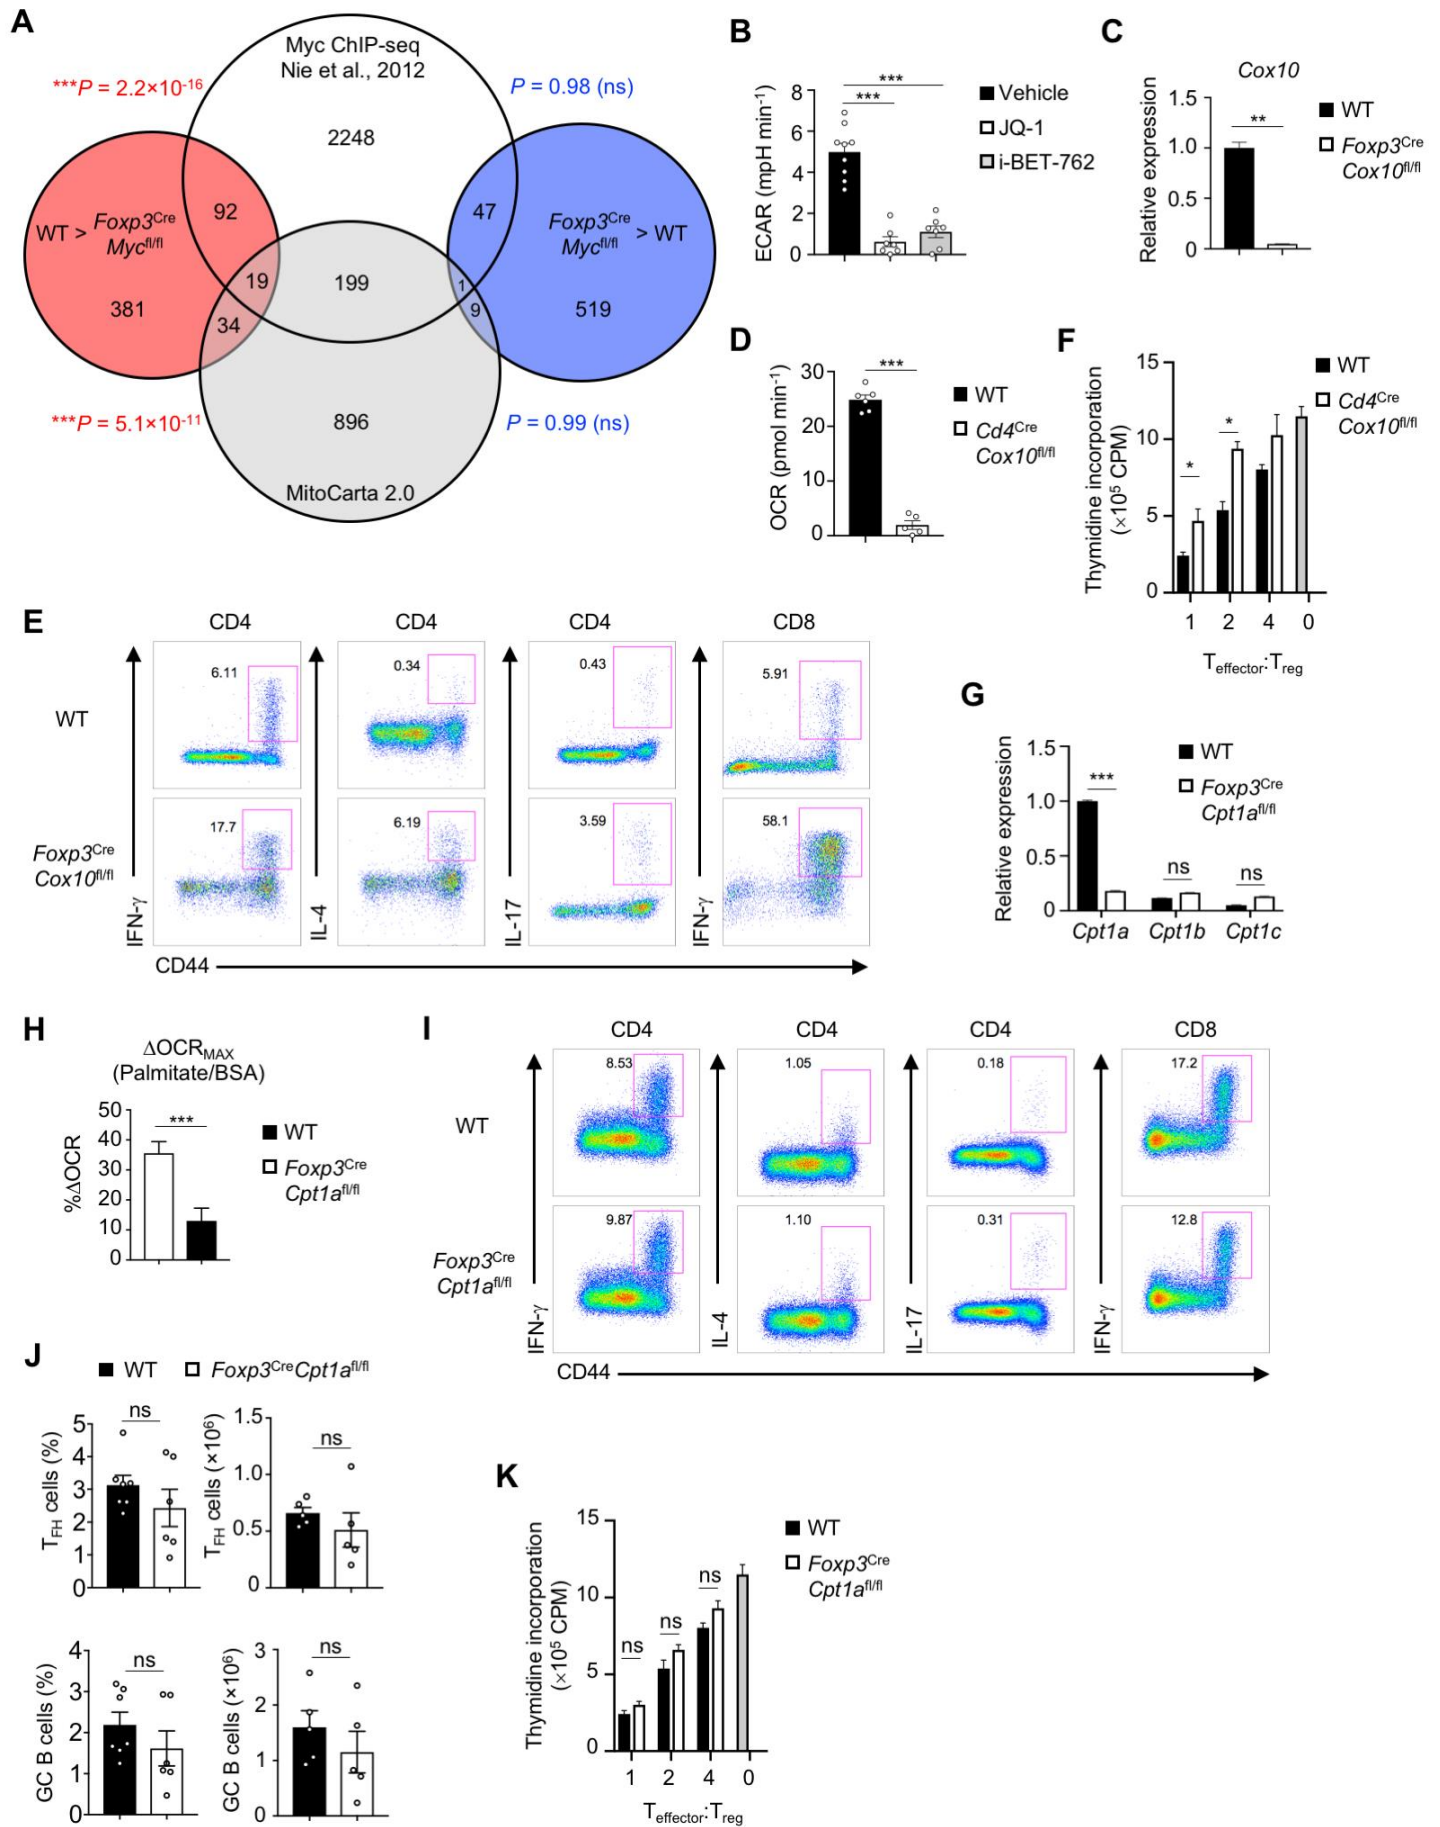

**Fig. S5. Immune homeostasis in mice with Cox10- or Cpt1a-deficient T<sub>reg</sub>s.** (A) Negative enrichment of direct Myc targets (defined in published Myc ChIP-seq data (10); top *P*-values), and mitochondria-related genes (defined in MitoCarta 2.0 database; bottom *P*-values) in Myc-deficient T<sub>reg</sub> cells. (B) Seahorse analysis of ECAR in T<sub>reg</sub> cells activated *in vitro* for 6 h in the presence of Myc inhibitors. (C) Deletion efficiency of *Cox10* in T<sub>reg</sub> cells. (D) Seahorse analysis of OCR in Cox10-deficient T<sub>reg</sub> cells. (E) Flow cytometry analysis of cytokine production in splenic non-T<sub>reg</sub> CD4<sup>+</sup> and CD8<sup>+</sup> T cells in WT and *Foxp3*<sup>Cre</sup>*Cox10*<sup>fl/fl</sup> mice. (F) T<sub>reg</sub> cell suppression assay comparing WT and Cox10-deficient T<sub>reg</sub> cells. (G) Deletion efficiency and additional Cpt1 isoform expression in T<sub>reg</sub> cells from WT and *Foxp3*<sup>Cre</sup>*Cpt1a*<sup>fl/fl</sup> mice. (H) Seahorse analysis of the difference in maximum OCR (following FCCP treatment) when assayed with BSA-conjugated palmitate. (I and J) Flow cytometry analysis of cytokine production in non-T<sub>reg</sub> CD4<sup>+</sup> and CD8<sup>+</sup> T cells (I), and quantification of GC responses (J) in WT and *Foxp3*<sup>Cre</sup>*Cpt1a*<sup>fl/fl</sup> mice. (K) T<sub>reg</sub> cell suppression assay comparing WT and Cpt1a-deficient T<sub>reg</sub> cells. Data are representative of or pooled from 3 (A, G), 1 (B, C, F, and K), 2 (D and E), or 4 (H to J) independent experiments with 1-2 mice per group per experiment. \**P* ≤ 0.05; \*\**P* ≤ 0.01; \*\*\**P* ≤ 0.001; ns, not significant; unpaired Student's *t*-test. Graphs show means ± SEM.
